# Supplementary material
Source: MDPI journal article supplement (https://www.mdpi.com/2313-0105/8/8/82)
Supplement: s1 [file s1]

## Supplementary Materials

# Synergistic Effect of Dual-Ceramics for Improving the Dispersion Stability and Coating Quality of Aqueous Ceramic Coating Slurries for Polyethylene Separators in Li Secondary Batteries

Ssendagire Kennedy <sup>1</sup>, Jeong-Tae Kim <sup>1</sup>, Jungmin Kim <sup>1</sup>, Yong Min Lee <sup>2,\*</sup>, Isheunesu Phiri <sup>1,\*</sup> and Sun-Yul Ryou <sup>1,\*</sup>

<sup>1</sup> Department of Chemical and Biological Engineering, Hanbat National University, 125 Dongseo-daero, Yuseong-gu, Daejeon 34158, Korea; ssendken1@gmail.com (S.K.); lab20172473@gmail.com (J.-T.K.); bigjlove77@gmail.com (J.K.)

<sup>2</sup> Department of Energy Systems Engineering, Daegu Gyeongbuk Institute of Science and Technology (DGIST), 333 Techno Jungang-Daero, Daegu 42988, Korea

\* Correspondence: yongmin.lee@dgist.ac.kr (Y.M.L.); isheunesuphiri@gmail.com (I.P.); mhryou@hanbat.ac.kr (S.-Y.R.)

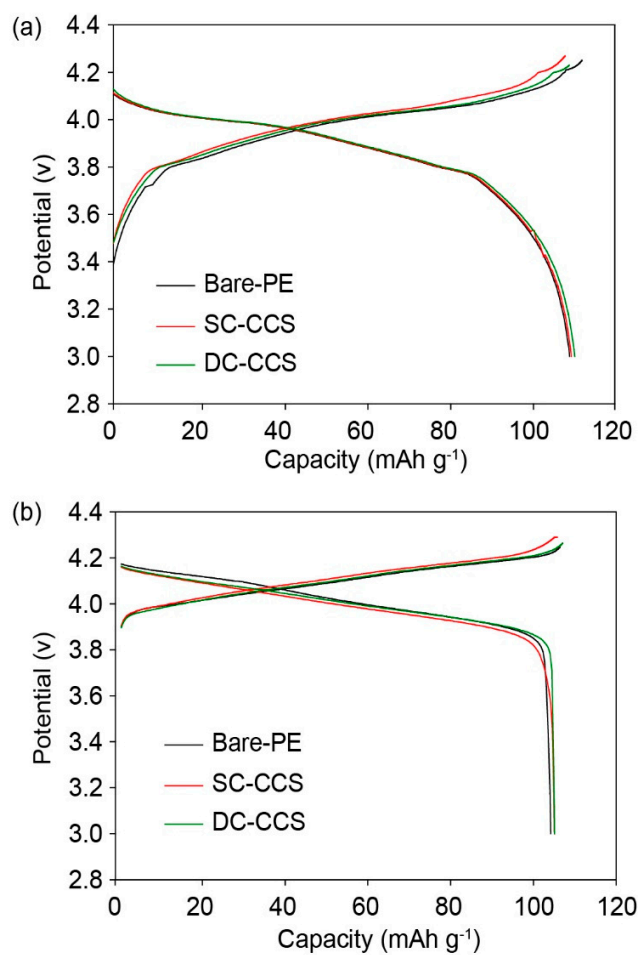

**Figure S1.** Potential profiles during the precycling (at a  $C/5$  rate between 3.0 and 4.3 V vs.  $\text{Li/Li}^+$ ) of (a) half cells (LMO/Li metal) and (b) full cells (LMO/graphite) (charging rate = discharging rate =  $C/5$ , i.e.,  $0.257 \text{ mA cm}^{-2}$ ).

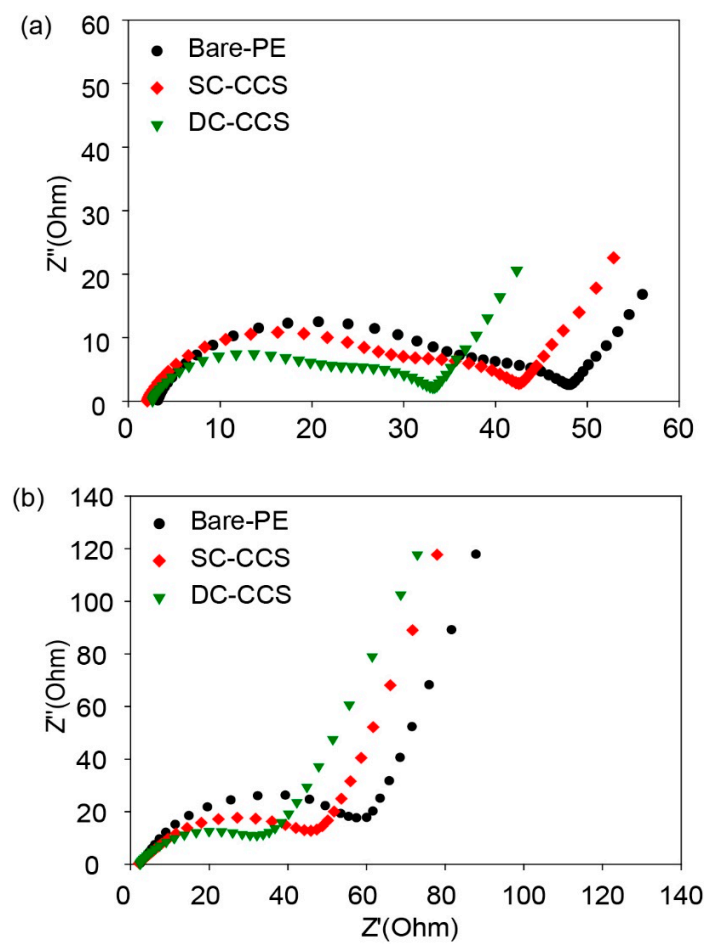

**Figure S2.** Nyquist plots of (a) full cells (LMO/graphite) and (b) half cells (LMO/Li metal) containing bare PE, SC-CCS, and DC-CCS PE separators after precycling, corresponding to Figure S1.

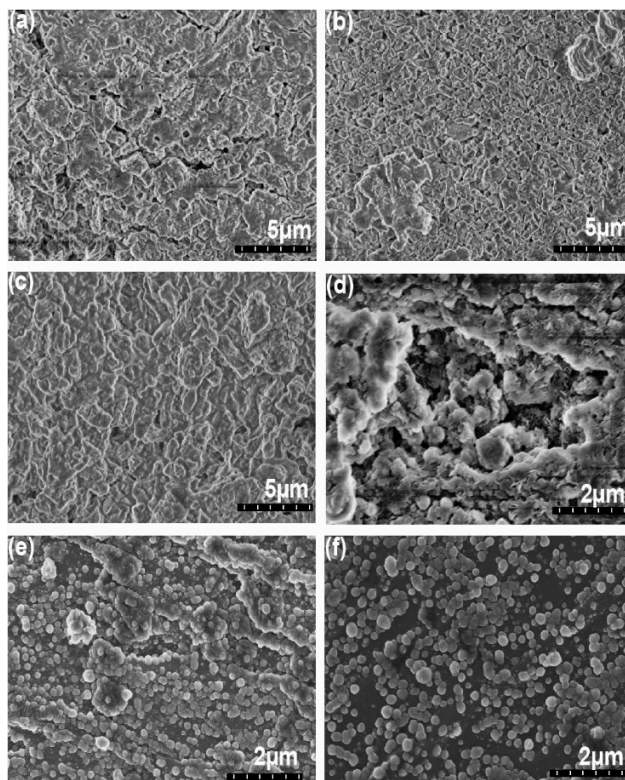

**Figure S3.** Surface SEM images of Li metal disassembled from half cells (LMO/Li metal) containing (a) bare PE, (b) SC-CCSs, and (c) DC-CCSs after cycle number 25, shown in Figure 7c. Surface SEM images of Li metal disassembled from Li/Li symmetric cells containing (d) bare PE, (e) SC-CCSs, and (f) DC-CCSs after plating at  $0.2 \text{ mA cm}^{-2}$  for 30 min.

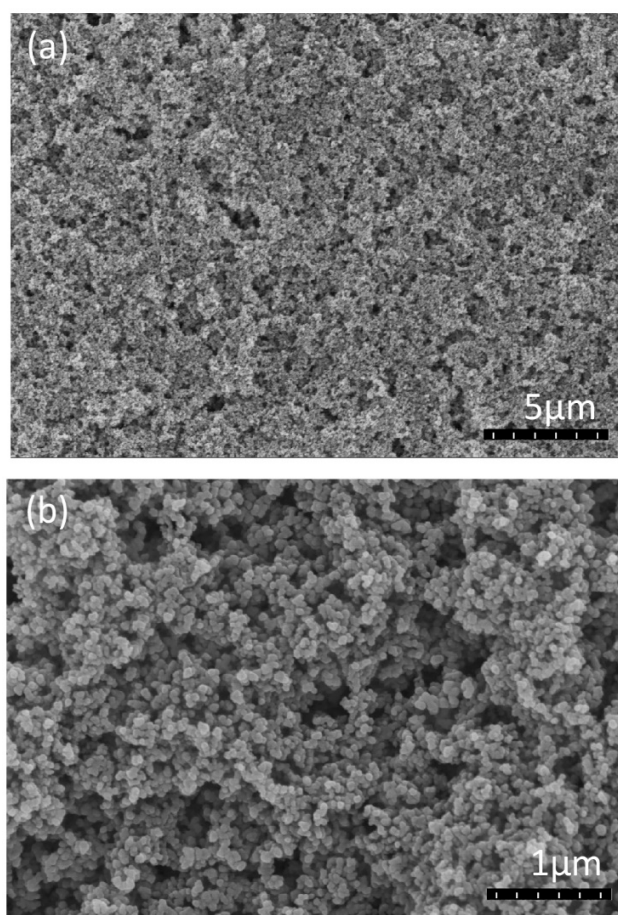

**Figure S4.** SEM images of SC-CCSs containing SiO<sub>2</sub>.

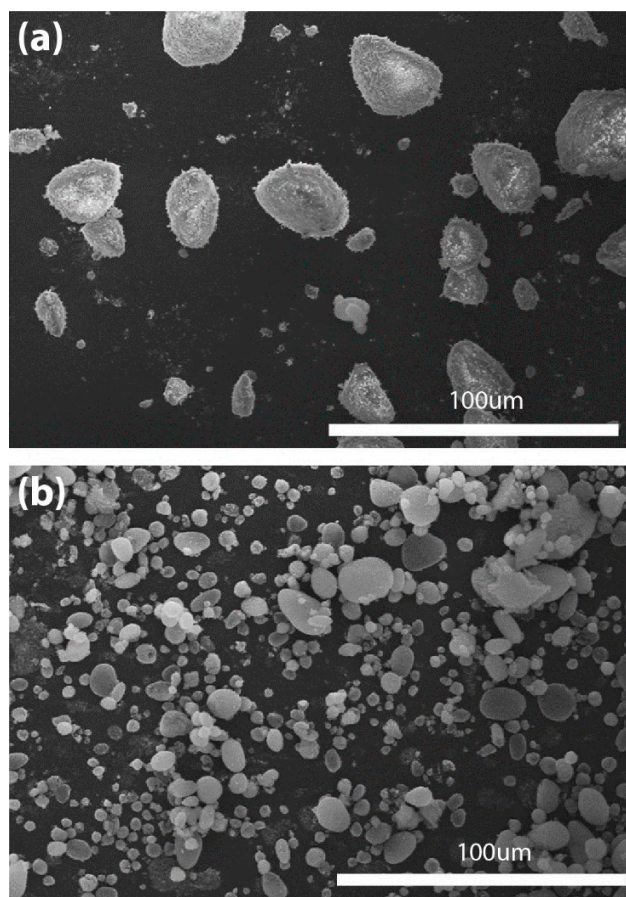

**Figure S5.** SEM images of pure (a)  $\text{Al}_2\text{O}_3$  and (b)  $\text{SiO}_2$ .

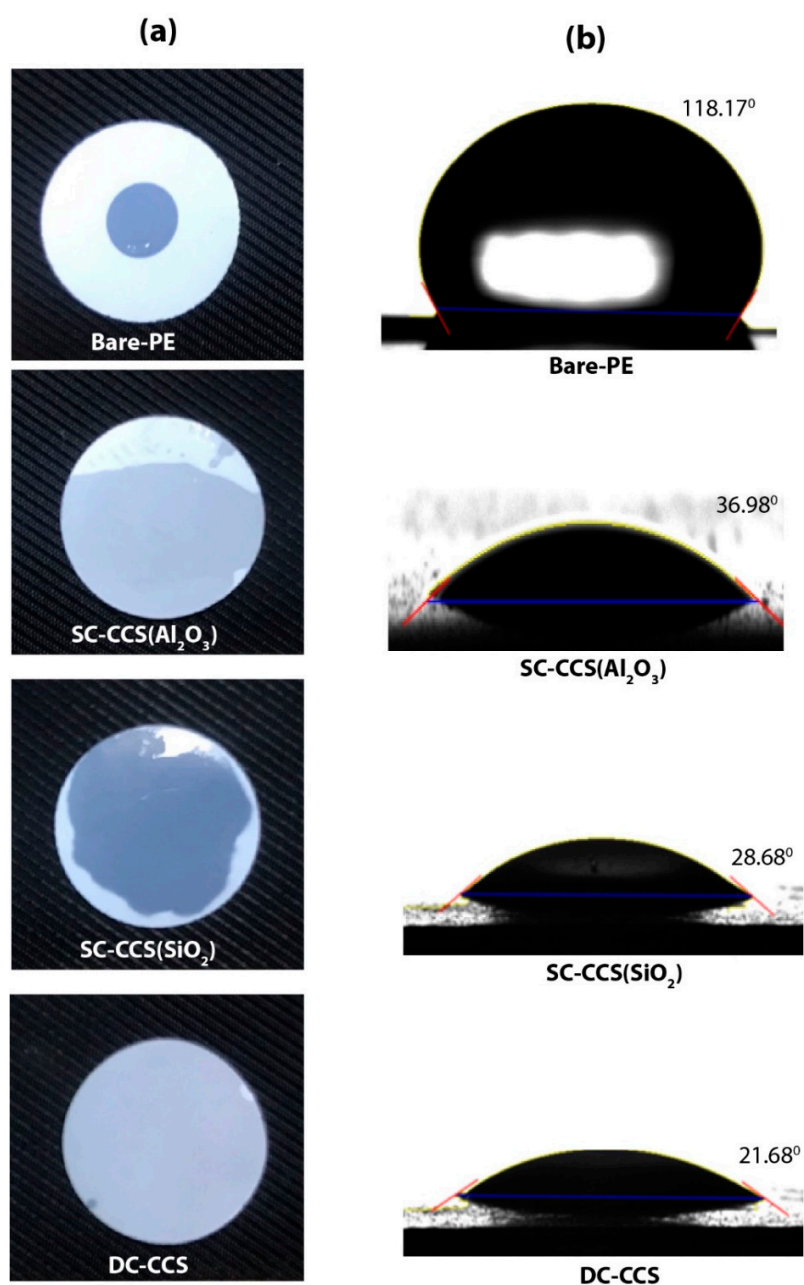

**Figure S6.** (a) Digital camera images of bare PE, SC-CCS( $\text{Al}_2\text{O}_3$ ), SC-CCS( $\text{SiO}_2$ ), and DC-CCSs surfaces 5 min after pouring a drop of liquid electrolyte. (b) Contact angle images of separator surfaces with a drop of D.I. water.

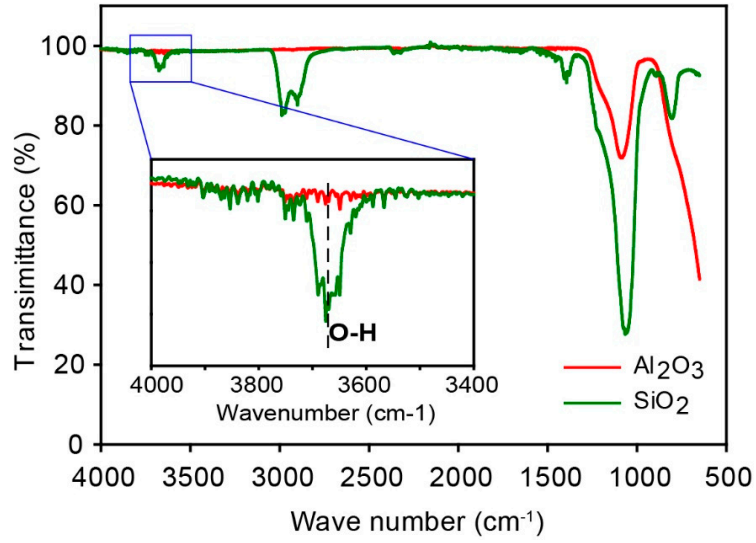

**Figure S7.** FT-IR spectra of SiO<sub>2</sub> and Al<sub>2</sub>O<sub>3</sub> showing the absorption bands of surface hydroxyl groups (–OH) on particle surfaces.

**Table S1.** Calculation of the Li transference number ( $t_+$ ) of each separator system

| Cell                                    | Polarization<br>time (h) | $\Delta V$ (mV) | $R_0$ ( $\Omega$ ) | $R_{ss}$ ( $\Omega$ ) | $I_0$ (mA) | $I_{ss}$ (mA) | $t_+$ |
|-----------------------------------------|--------------------------|-----------------|--------------------|-----------------------|------------|---------------|-------|
| Bare-PE                                 | 5                        | 10              | 1.348              | 1.383                 | 0.0198     | 0.0065        | 0.33  |
| SC-CCS(Al <sub>2</sub> O <sub>3</sub> ) | 5                        | 10              | 1.511              | 2.174                 | 0.0156     | 0.0062        | 0.40  |
| SC-CCS(SiO <sub>2</sub> )               | 5                        | 10              | 1.700              | 2.522                 | 0.0190     | 0.0082        | 0.43  |
| DC-CCS                                  | 5                        | 10              | 1.554              | 1.681                 | 0.0158     | 0.0070        | 0.45  |

The Li transference number ( $t_+$ ) is determined by the following equation [1]:

$$t_+ = \frac{I_{ss} (\Delta V - I_0 R_0)}{I_0 (\Delta V - I_{ss} R_{ss})}$$

where  $I_{ss}$  is the steady-state current,  $I_0$  is the initial current,  $\Delta V$  is the applied potential,  $R_e$  is the electrolyte resistance, and  $R_{ss}$  and  $R_0$  are the electrode resistances after and before the polarization, respectively.



## Reference

[1] Evans, J.; Vincent, C.A.; Bruce, P.G. Electrochemical measurement of transference numbers in polymer electrolytes. *Polymer* **1987**, *28*, 2324-2328.
